# Supplementary material
Source: ML conference proceedings conference paper supplement (https://aclanthology.org/D16-1241)
Supplement: Attachment [file D16-1241.Attachment.zip]

# Supplemental Material:

## Who did What: A Large-Scale Person-Centered Cloze Dataset

### Abstract

We include pseudocode for generating questions (Alg. 1) and multiple choice answer sets (Alg. 2).

**Data:** an article  $A$

**Result:** either *null*, if no question can be formed from  $A$ , or a cloze question  $q$  and the deleted person named entity (NE)  $t$ .

$s \Leftarrow$  the first sentence of the article  $A$ .

**if not**  $10 \leq |s| \leq 120$  **then** return *null* ;

$E \Leftarrow$  The set of person NEs  $e$  in  $s$  such that  $e$  contains no more than three words. Named entities sharing a word with an earlier named entity are deleted.

**if**  $|E| < 2$  **then** return *null* ;

$T \Leftarrow$  constituent parse tree of  $s$

**for**  $e \in E$  *starting from the end of*  $s$  **do**

$b \Leftarrow$  The node in  $T$  for person NE  $e$ .

**while**  $b.category \in \{NP, NNP, NNPS\}$   
        and  $b.head = e$  and no element of  
         $b.descendant$  has category *SBAR* **do**  
        |  $b \Leftarrow b.parent$

**end**

**if** no element of  $b.descendant$  has head  
        word “and” **then**

        | return  $(q, e)$  where  $q$  is the cloze  
        | question formed from deleting  $b$  from  
        |  $s$ .

**end**

**end**

return *null*

**Algorithm 1:** Question Formation. Named entities are recognized by the Stanford NER system and parse trees are generated by the Stanford PCFG parser. Here  $X.category$  is the syntactic category of parse node  $X$ ,  $X.parent$  is the parent-node of the node  $X$ ,  $X.descendant$  is the set of descendants of  $X$  and  $X.head$  is the head word of  $X$ .

**Data:** a pair  $(q, e)$  returned by Algorithm 1.

**Result:** either *null*, if no appropriate passage can be found, or a passage  $a$  and multiple choice answer set  $C$ .

```
 $p \leftarrow null$ 
for  $a \in \text{RankedArticles}(q, e)$  do
   $C \leftarrow$  The set of person NEs in  $a$  different from
   $e$  and not in  $q$ . Named entities appearing as
  sub-part of an earlier named entity are deleted.
  if  $2 \leq |E| \leq 5$  then return  $(a, C)$ ;
end
return null
```

```
RankedArticles $(q, e)\{$ 
   $A_r \leftarrow \emptyset$ 
  for  $t \in \{1, 3, 7, 14\}$  do
     $A \leftarrow \text{Articles}(q, e, t)$ 
    for  $a \in A$  do
      if  $\text{isValid}(a, q)$  then
         $A_r \leftarrow A_r$  followed by  $a$ 
      end
    end
  end
  return  $A_r$ 
}
```

```
Articles $(q, e, t)\{$ 
  Result: articles containing the person NE  $e$ ,
  published within  $t$  days of the article from
  which  $q$  was taken, and ranked by Apache
  Lucene.
}
```

```
isValid $(a, q)\{$ 
   $a$  is a valid passage for  $q$  if the following hold:
  • no sentence in  $a$  shares more than 78% of its words
    with the question  $q$ .
  • no sentence in  $a$  contains the sequence of five words
    to the left of the blank in  $q$ , and similarly for the
    sequence to the right.
  •  $a$  contains at least one of the person NEs in  $q$ . (All
    person NEs in  $q$  are different from  $e$ . Two named
    entities are considered the same if they share some
    words.)
}
```

## Algorithm 2: Passage Selection
