# Supplementary material
Source: ML conference proceedings conference paper supplement (https://aclanthology.org/D16-1241)
Supplement: Attachment [file D16-1241.Attachment.zip]

Archive with 1 entries (1 files):
- supplement.pdf
